# Supplementary material
Source: PubMed Central journal article supplement (PMC3478516)
Supplement: supp_blood-2012-04-423046_blood-2012-04-423046-1.pdf [file supp_blood-2012-04-423046_blood-2012-04-423046-1.pdf]

**SUPPLEMENTAL MATERIAL**

**2 SUPPLEMENTAL TABLES**

**Supplemental Table 1. Univariate regression model for relapse/mortality (Failure of RFS)**

| Variable                 | Group                    | HR   | 95% CI      | p-value | Global p-value |
|--------------------------|--------------------------|------|-------------|---------|----------------|
| Marrow myeloblasts*      |                          | 1.02 | 1.01 - 1.02 | <.0001  |                |
| Hemoglobin*              |                          | 0.94 | 0.89 - 0.99 | .03     |                |
| Platelet count*          |                          | 0.94 | 0.90 - 0.97 | .0008   |                |
| Patient age*             |                          | 1.07 | 1.03 - 1.13 | .002    |                |
| Disease category         | MDS                      | 1    |             |         |                |
|                          | tAML                     | 1.59 | 1.35 - 1.87 | <.0001  |                |
| IPSS cytogenetic risk    | Good                     | 1    |             |         | <.0001         |
|                          | Intermediate             | 1.15 | 0.92 - 1.43 | .22     |                |
|                          | Poor                     | 1.88 | 1.58 - 2.25 | <.0001  |                |
| 5-group cytogenetic risk | Good                     | 1    |             |         | <.0001         |
|                          | Very good                | 1.23 | 0.63 - 2.39 | .55     |                |
|                          | Intermediate             | 1.15 | 0.92 - 1.44 | .22     |                |
|                          | Poor                     | 1.34 | 1.06 - 1.68 | .01     |                |
|                          | Very poor                | 3.61 | 2.83 - 4.61 | <.0001  |                |
|                          | Data incomplete          | 1.83 | 1.46 - 2.28 | <.0001  |                |
| Donor type               | Matched sibling          | 1    |             |         | .02            |
|                          | Non-sibling relative     | 1.30 | 0.99 - 1.71 | .06     |                |
|                          | URD matched              | 0.86 | 0.71 - 1.04 | .12     |                |
|                          | URD mismatched           | 1.18 | 0.95 - 1.46 | .14     |                |
|                          | URD unknown <sup>†</sup> | 0.80 | 0.51 - 1.25 | .32     |                |
| Year of HCT*             |                          | 0.98 | 0.97 - 0.99 | .002    |                |

|                                   |                               |      |      |   |      |        |
|-----------------------------------|-------------------------------|------|------|---|------|--------|
| Monosomal karyotype               | No                            | 1    |      |   |      |        |
|                                   | Yes                           | 2.64 | 2.18 | - | 3.19 | <.0001 |
| Secondary MDS                     | No                            | 1    |      |   |      |        |
|                                   | Yes                           | 1.31 | 1.10 | - | 1.55 | .002   |
| Conditioning regimen <sup>‡</sup> | BU+CY                         | 1    |      |   |      | <.0001 |
|                                   | FLU+LDTBI                     | 1.48 | 1.13 | - | 1.93 | .004   |
|                                   | BU+TBI                        | 1.99 | 1.49 | - | 2.65 | <.0001 |
|                                   | FLU+BU                        | 1.55 | 1.09 | - | 2.19 | .01    |
|                                   | BU+CY+TBI                     | 1.69 | 1.18 | - | 2.42 | .004   |
|                                   | <sup>131</sup> I+FLU+TBI      | 1.68 | 1.04 | - | 2.71 | .03    |
|                                   | FLU+TREG                      | 0.45 | 0.20 | - | 1.01 | .05    |
|                                   | CY+TBI (≥ 12 Gy)<br>(± ATG)   | 1.54 | 1.27 | - | 1.88 | <.0001 |
|                                   | Other                         | 1.54 | 1.01 | - | 2.34 | .04    |
| FAB/WHO classification            | RA/RARS/RCMD.                 | 1    |      |   |      | <.0001 |
|                                   | MDS                           | 0.75 | 0.37 | - | 1.51 | .41    |
|                                   | RAEB.                         | 1.73 | 1.45 | - | 2.07 | <.0001 |
|                                   | RAEB-T                        | 2.04 | 1.57 | - | 2.64 | <.0001 |
|                                   | tAML                          | 2.34 | 1.85 | - | 2.98 | <.0001 |
| Etiology <sup>§</sup>             | de novo                       | 1    |      |   |      | <.0001 |
|                                   | MPN                           | 2.22 | 1.10 | - | 4.47 | .03    |
|                                   | Lymphoma                      | 1.44 | 1.06 | - | 1.94 | .02    |
|                                   | Multiple myeloma              | 2.80 | 1.16 | - | 6.77 | .02    |
|                                   | Solid tumor                   | 1.39 | 1.01 | - | 1.91 | .04    |
|                                   | Autoimmune disorders          | 1.54 | 0.95 | - | 2.50 | .08    |
|                                   | Accidental radiation exposure | 10.2 | 2.52 | - | 41.1 | .001   |
| Treatment pre-HCT                 | No                            | 1    |      |   |      | .008   |
|                                   | IC                            | 1.31 | 1.12 | - | 1.54 | .001   |

|                    |      |      |   |      |     |
|--------------------|------|------|---|------|-----|
| IC+Hypomethylation | 0.43 | 0.06 | - | 3.08 | .40 |
| Hypomethylation    | 1.09 | 0.72 | - | 1.63 | .69 |

\*Modeled as continuous linear variables (as specified in Table 5);

†HLA allele level typing not performed.

‡Other regimens (CY+TMI; CY+BU; FLU+TBI+CY) had no significant impact.

§Other antecedent conditions (aplastic anemia; constitutional marrow failure syndromes; other leukemias; organ transplantation) had no significant impact.

Abbreviations: ATG=antithymocyte globulin; BU= busulfan;CI=confidence interval; CY = cyclophosphamide;

FAB = French-American-British classification; FLU= fludarabine; <sup>131</sup>I = Iodine-131

radioimmunotherapy; HR=hazard ratio; IC=induction chemotherapy; IPSS = International Prognostic Scoring System; RA = refractory anemia; RARS = RA with ring sideroblasts; RAEB = refractory anemia with excess blasts; RAEB-T = RAEB in transformation; RCMD = refractory cytopenia with multilineage dysplasia; RFS = relapse-free survival; tAML = acute myeloid leukemia transformed from MDS; URD= unrelated donor; TBI=total body irradiation (LD= low dose); TREO= treosulfan; URD = unrelated donor; WHO = World Health Organization.

**Supplemental Table 2. Multivariable regression model for relapse/mortality (Failure of RFS)**

| Variable                          | Group                    | HR   | 95% CI      | p-value | Global p-value |
|-----------------------------------|--------------------------|------|-------------|---------|----------------|
| 5-group cytogenetic risk          | Good                     | 1    |             |         | <.0001         |
|                                   | Very Good                | 1.25 | 0.61 - 2.56 | .54     |                |
|                                   | Intermediate             | 1.04 | 0.83 - 1.32 | .72     |                |
|                                   | Poor                     | 1.26 | 0.98 - 1.62 | .07     |                |
|                                   | Very poor                | 3.02 | 2.31 - 3.94 | <.0001  |                |
|                                   | Data incomplete          | 1.76 | 1.36 - 2.29 | <.0001  |                |
| FAB/WHO classification            | RA/RARS/RCMD             | 1    |             |         | .001           |
|                                   | RAEB.                    | 1.48 | 1.21 - 1.81 | .0002   |                |
|                                   | RAEB-T                   | 1.53 | 1.15 - 2.05 | .004    |                |
|                                   | tAML                     | 1.44 | 1.04 - 1.99 | .03     |                |
| Disease category                  | MDS                      | 1    |             |         |                |
|                                   | tAML                     | 1.43 | 1.15 - 1.78 | .002    |                |
| Platelet count*                   |                          | 1.00 | 1.00 - 1.00 | .0006   |                |
| Patient age*                      |                          | 1.01 | 1.01 - 1.02 | <.0001  |                |
| Year of HCT*                      |                          | 0.97 | 0.95 - 0.99 | .01     |                |
| Donor type                        | Matched sibling          | 1    |             |         | .03            |
|                                   | Non-sibling relative     | 1.23 | 0.91 - 1.68 | .18     |                |
|                                   | URD matched              | 1.06 | 0.85 - 1.32 | .60     |                |
|                                   | URD mismatched           | 1.42 | 1.12 - 1.80 | .003    |                |
|                                   | URD unknown <sup>†</sup> | 0.85 | 0.52 - 1.40 | .53     |                |
| Conditioning regimen <sup>‡</sup> | BU+CY                    | 1    |             |         | .02            |

|                       |                               |      |             |        |
|-----------------------|-------------------------------|------|-------------|--------|
|                       | FLU+LDTBI                     | 1.46 | 1.07 - 1.99 | .02    |
|                       | BU+TBI                        | 1.63 | 1.18 - 2.24 | .003   |
|                       | FLU+TREO                      | 0.48 | 0.21 - 1.12 | .09    |
|                       | Other                         | 1.82 | 1.05 - 3.16 | .03    |
| Etiology <sup>§</sup> | de novo                       | 1    |             | <.0001 |
|                       | Multiple myeloma              | 7.88 | 2.84 - 21.8 | .0001  |
|                       | Solid tumor                   | 1.85 | 1.30 - 2.63 | .0007  |
|                       | Organ transplantation         | 17.2 | 4.87 - 60.8 | <.0001 |
|                       | Accidental radiation exposure | 10.3 | 1.39 - 77.2 | .02    |

\* Modeled as continuous linear variables (as specified in Table 5).

†HLA allele typing was not carried out.

‡Other regimens (CY+TMI; FLU+BU; BU+CY+TBI; <sup>131</sup>I+FLU+TBI; FLU+LDTBI+CY; CY+TBI[≥12 Gy]) had no significant impact.

§Other antecedent conditions (aplastic anemia; myeloproliferative neoplasms; constitutional marrow failure syndromes; other leukemias; Hodgkin/Non-Hodgkin lymphoma; autoimmune disorders) had no significant impact.

Abbreviations: ATG=antithymocyte globulin; BU= busulfan; CI= confidence interval; CY = cyclophosphamide; FAB = French-American-British classification; FLU= fludarabine; HR= hazard ratio; <sup>131</sup>I = Iodine-131 radioimmunotherapy; IC=induction chemotherapy; IPSS = International Prognostic Scoring System; RA = refractory anemia; RARS = RA with ring sideroblasts; RAEB = refractory anemia with excess blasts; RAEB-T = RAEB in transformation; RCMD = refractory cytopenia with multilineage dysplasia; RFS = relapse-free survival; tAML = acute myeloid leukemia transformed from MDS; TBI=total body irradiation (LD= low dose); TREO= treosulfan; URD = unrelated donor; WHO = World Health Organization.
